# Supplementary material for: Peripheral endotoxin exposure in mice activates crosstalk between phagocytes in the brain and periphery
Source: Research Square preprint supplement (doi:10.21203/rs.3.rs-4478250/v1), 2024-06-07
Supplement: Supplementary file 1 [file e5ca2a860f4ed8df5d676e36.docx]

| Kullback-Leibler divergence | Holm-adjusted *p*-value |
| --- | --- |
| B-lymphocytes | |
| 0.056 | 0.23 |
| CD45- cells | |
| 0.039 | 0.064 |
| Dendritic cells | |
| 0.045 | 0.497 |
| Granulocytes | |
| **0.132** | **< 0.001** |
| Macrophages | |
| **0.092** | **< 0.001** |
| Microglia | |
| **0.107** | **< 0.001** |
| Monocytes | |
| **0.046** | **0.007** |
| Natural killer cells | |
| 0.052 | 0.941 |
| T-cells | |
| 0.029 | 0.993 |
